# Supplementary material for: Long-Term Exposure to Fine Particulate Matter: Association with Nonaccidental and Cardiovascular Mortality in the Agricultural Health Study Cohort
Source: PubMed Central journal article supplement (PMC4050514; doi:10.1289/ehp.1307277), 2014-03-14

## **Supplemental Material**

# **Long-Term Exposure to Fine Particulate Matter: Association with Nonaccidental and Cardiovascular Mortality in the Agricultural Health Study Cohort**

Scott Weichenthal, Paul J. Villeneuve, Richard T. Burnett, Aaron van Donkelaar, Randall V. Martin, Rena R. Jones, Curt T. DellaValle, Dale P. Sandler, Mary H. Ward, and Jane A. Hoppin

| <b>Table of Contents</b>                                                                                                                                                                                                                                                                            | <b>Page</b> |
|-----------------------------------------------------------------------------------------------------------------------------------------------------------------------------------------------------------------------------------------------------------------------------------------------------|-------------|
| <b>Table S1.</b> Hazard ratios for nonaccidental mortality per 10 $\mu\text{g}/\text{m}^3$ increase in ambient $\text{PM}_{2.5}$ among participants in the Agricultural Health Study, 1993-2011 (excluding participants with exposures assigned to Zip-code centroids)                              | 2           |
| <b>Table S2.</b> Hazard ratios for cardiovascular mortality per 10 $\mu\text{g}/\text{m}^3$ increase in ambient $\text{PM}_{2.5}$ among men in the Agricultural Health Study, 1993-2011 with adjustment for additional smoking variables and occupational exposures                                 | 3           |
| <b>Table S3.</b> Hazard ratios for nonaccidental and cardiovascular mortality per 10 $\mu\text{g}/\text{m}^3$ increase in ambient $\text{PM}_{2.5}$ among participants in the Agricultural Health Study, 1993-2011 (missing BMI and vegetable intake values replaced with sex-specific mean values) | 4           |
| <b>Figure S1.</b> Correlation between remote-sensed $\text{PM}_{2.5}$ and surface concentrations in Iowa and North Carolina between 2001-2006. Crosses on each map indicate monitoring locations                                                                                                    | 5           |

**Table S1.** Hazard ratios for nonaccidental mortality<sup>a</sup> per 10 µg/m<sup>3</sup> increase in ambient PM<sub>2.5</sub> among participants in the Agricultural Health Study, 1993-2011 (excluding participants with exposures assigned to Zip-code centroids)

| <b>Population</b> | <b>No. Deaths</b> | <b>Minimally Adjusted<sup>b</sup><br/>HR (95% CI)</b> | <b>No. Deaths</b> | <b>Moderately Adjusted<sup>c</sup><br/>HR (95% CI)</b> | <b>No. Deaths</b> | <b>Fully Adjusted<sup>d</sup><br/>HR (95% CI)</b> |
|-------------------|-------------------|-------------------------------------------------------|-------------------|--------------------------------------------------------|-------------------|---------------------------------------------------|
| All               | 4774              | 0.96 (0.78, 1.18)                                     | 3353              | 0.98 (0.77, 1.26)                                      | 3268              | 1.02 (0.79, 1.31)                                 |
| Men               | 3409              | 0.98 (0.77, 1.26)                                     | 2289              | 1.06 (0.79, 1.43)                                      | 2226              | 1.15 (0.85, 1.56)                                 |
| Women             | 1365              | 0.90 (0.60, 1.34)                                     | 1064              | 0.81 (0.51, 1.29)                                      | 1042              | 0.79 (0.49, 1.26)                                 |
| Non-Movers        |                   |                                                       |                   |                                                        |                   |                                                   |
| All               | 3538              | 0.94 (0.74, 1.20)                                     | 2441              | 0.89 (0.67, 1.20)                                      | 2375              | 0.95 (0.70, 1.28)                                 |
| Men               | 2500              | 1.00 (0.75, 1.32)                                     | 1642              | 1.04 (0.74, 1.48)                                      | 1593              | 1.15 (0.80, 1.65)                                 |
| Women             | 1038              | 0.82 (0.52, 1.29)                                     | 799               | 0.62 (0.36, 1.06)                                      | 782               | 0.62 (0.36, 1.07)                                 |

Abbreviations: CI, confidence interval; HR, hazard ratio. <sup>a</sup>ICD-10 codes I10-I70; <sup>b</sup>Age as follow-up time and adjusted for gender, State of enrollment, and birth year; <sup>c</sup>Minimally adjusted plus covariates for pack-years of smoking and body mass index; <sup>d</sup>Moderately adjusted plus covariates for marital status, education level, alcoholic drinks per month, and vegetable intake.

**Table S2.** Hazard ratios for cardiovascular mortality<sup>a</sup> per 10 µg/m<sup>3</sup> increase in ambient PM<sub>2.5</sub> among men in the Agricultural Health Study, 1993-2011 with adjustment for additional smoking variables and occupational exposures.

| <b>Additional Covariates</b> | <b>No. Deaths</b> | <b>Minimally Adjusted<sup>b</sup><br/>HR (95% CI)</b> | <b>No. Deaths</b> | <b>Moderately Adjusted<sup>c</sup><br/>HR (95% CI)</b> | <b>No. Deaths</b> | <b>Fully Adjusted<sup>d</sup><br/>HR (95% CI)</b> |
|------------------------------|-------------------|-------------------------------------------------------|-------------------|--------------------------------------------------------|-------------------|---------------------------------------------------|
| Primary model                | 1534              | 1.08 (0.75, 1.56)                                     | 973               | 1.37 (0.87, 2.17)                                      | 950               | 1.43 (0.89, 2.27)                                 |
| <b>Plus (separately):</b>    |                   |                                                       |                   |                                                        |                   |                                                   |
| Occupational Exposures       |                   |                                                       |                   |                                                        |                   |                                                   |
| Repair Engines               | 1458              | 1.08 (0.75, 1.57)                                     | 934               | 1.40 (0.88, 2.24)                                      | 911               | 1.46 (0.91, 2.35)                                 |
| Weld                         | 1526              | 1.13 (0.78, 1.63)                                     | 966               | 1.42 (0.90, 2.24)                                      | 943               | 1.48 (0.92, 2.36)                                 |
| Years Mix/ Apply Pesticide   | 1378              | 1.09 (0.74, 1.61)                                     | 923               | 1.40 (0.88, 2.25)                                      | 902               | 1.47 (0.91, 2.39)                                 |
| Grind metal                  | 1534              | 1.09 (0.75, 1.56)                                     | 973               | 1.38 (0.88, 2.18)                                      | 950               | 1.44 (0.90, 2.29)                                 |
| Diesel Tractors              | 1534              | 1.09 (0.75, 1.56)                                     | 973               | 1.38 (0.87, 2.17)                                      | 950               | 1.44 (0.90, 2.29)                                 |
| Gas Tractors                 | 1534              | 1.07 (0.74, 1.54)                                     | 973               | 1.38 (0.87, 2.17)                                      | 950               | 1.43 (0.89, 2.28)                                 |
| Physical Activity            | 742               | 1.30 (0.77, 2.19)                                     | 651               | 1.08 (0.61, 1.91)                                      | 639               | 1.08 (0.60, 1.93)                                 |
| Smoking                      |                   |                                                       |                   |                                                        |                   |                                                   |
| Current/former/never         | 1447              | 1.08 (0.74, 1.58)                                     | 971               | 1.35 (0.86, 2.13)                                      | 948               | 1.40 (0.88, 2.23)                                 |
| Pipe                         | 1526              | 1.10 (0.76, 1.58)                                     | 966               | 1.39 (0.88, 2.20)                                      | 943               | 1.45 (0.91, 2.32)                                 |
| Cigars                       | 1526              | 1.10 (0.76, 1.59)                                     | 966               | 1.40 (0.88, 2.22)                                      | 943               | 1.45 (0.91, 2.32)                                 |
| Chew Tobacco                 | 1526              | 1.10 (0.76, 1.58)                                     | 966               | 1.39 (0.88, 2.20)                                      | 943               | 1.45 (0.90, 2.31)                                 |
| Cigs/day                     | 1405              | 1.07 (0.73, 1.56)                                     | 973               | 1.38 (0.87, 2.17)                                      | 950               | 1.43 (0.89, 2.27)                                 |
| Years smoked                 | 1416              | 1.13 (0.77, 1.66)                                     | 973               | 1.38 (0.87, 2.18)                                      | 950               | 1.43 (0.90, 2.28)                                 |

Abbreviations: CI, confidence interval; HR, hazard ratio. <sup>a</sup>ICD-10 codes I10-I70; <sup>b</sup>Age as follow-up time and adjusted for gender, State of enrollment, and birth year; <sup>c</sup>Minimally adjusted plus covariates for pack-years of smoking and body mass index; <sup>d</sup>Moderately adjusted plus covariates for marital status, education level, alcoholic drinks per month, and vegetable intake.

**Table S3.** Hazard ratios for nonaccidental and cardiovascular mortality per 10  $\mu\text{g}/\text{m}^3$  increase in ambient  $\text{PM}_{2.5}$  among participants in the Agricultural Health Study, 1993-2011 (missing BMI and vegetable intake values replaced with sex-specific mean values).

| <b>Cause of Death</b>             | <b>No. Deaths</b> | <b>Minimally Adjusted<sup>a</sup><br/>HR (95% CI)</b> | <b>No. Deaths</b> | <b>Moderately Adjusted<sup>b</sup><br/>HR (95% CI)</b> | <b>No. Deaths</b> | <b>Fully Adjusted<sup>c</sup><br/>HR (95% CI)</b> |
|-----------------------------------|-------------------|-------------------------------------------------------|-------------------|--------------------------------------------------------|-------------------|---------------------------------------------------|
| <b>Non-Accidental<sup>d</sup></b> |                   |                                                       |                   |                                                        |                   |                                                   |
| All                               | 5929              | 0.92 (0.76, 1.11)                                     | 5397              | 0.93 (0.76, 1.13)                                      | 5243              | 0.94 (0.77, 1.15)                                 |
| Men                               | 4271              | 0.97 (0.78, 1.20)                                     | 3891              | 0.96 (0.76, 1.21)                                      | 3770              | 1.00 (0.79, 1.27)                                 |
| Women                             | 1658              | 0.80 (0.56, 1.15)                                     | 1506              | 0.85 (0.58, 1.25)                                      | 1473              | 0.82 (0.55, 1.21)                                 |
| Non-Movers: All                   | 4019              | 0.85 (0.68, 1.06)                                     | 3661              | 0.86 (0.68, 1.09)                                      | 3554              | 0.90 (0.70, 1.15)                                 |
| Non-Movers: Men                   | 2860              | 0.93 (0.71, 1.21)                                     | 2611              | 0.94 (0.71, 1.25)                                      | 2527              | 1.02 (0.76, 1.36)                                 |
| Non-Movers: Women                 | 1159              | 0.67 (0.44, 1.03)                                     | 1050              | 0.67 (0.43, 1.06)                                      | 1027              | 0.66 (0.41, 1.05)                                 |
| <b>Cardiovascular<sup>e</sup></b> |                   |                                                       |                   |                                                        |                   |                                                   |
| All                               | 1967              | 1.00 (0.72, 1.37)                                     | 1757              | 1.04 (0.73, 1.47)                                      | 1704              | 1.02 (0.71, 1.45)                                 |
| Men                               | 1534              | 1.08 (0.75, 1.56)                                     | 1378              | 1.08 (0.73, 1.59)                                      | 1336              | 1.07 (0.72, 1.59)                                 |
| Women                             | 433               | 0.73 (0.37, 1.46)                                     | 379               | 0.91 (0.43, 1.93)                                      | 368               | 0.84 (0.39, 1.81)                                 |
| Non-Movers: All                   | 1357              | 1.00 (0.67, 1.46)                                     | 1220              | 1.02 (0.68, 1.55)                                      | 1184              | 1.06 (0.70, 1.62)                                 |
| Non-Movers: Men                   | 1043              | 1.16 (0.75, 1.80)                                     | 946               | 1.16 (0.73, 1.85)                                      | 917               | 1.21 (0.75, 1.95)                                 |
| Non-Movers: Women                 | 314               | 0.59 (0.26, 1.32)                                     | 274               | 0.66 (0.27, 1.61)                                      | 267               | 0.64 (0.26, 1.60)                                 |

Abbreviations: CI, confidence interval; HR, hazard ratio. <sup>a</sup>Age as follow-up time and adjusted for gender, State of enrollment, and birth year; <sup>b</sup>Minimally adjusted plus covariates for pack-years of smoking and body mass index; <sup>c</sup>Moderately adjusted plus covariates for marital status, education level, alcoholic drinks per month, and vegetable intake. <sup>d</sup>ICD-10 codes <V01; <sup>e</sup>ICD-10 codes I10-I70.

**Figure S1.** Correlation between remote-sensed PM<sub>2.5</sub> and surface concentrations in Iowa and North Carolina between 2001-2006. Crosses on each map indicate monitoring locations.

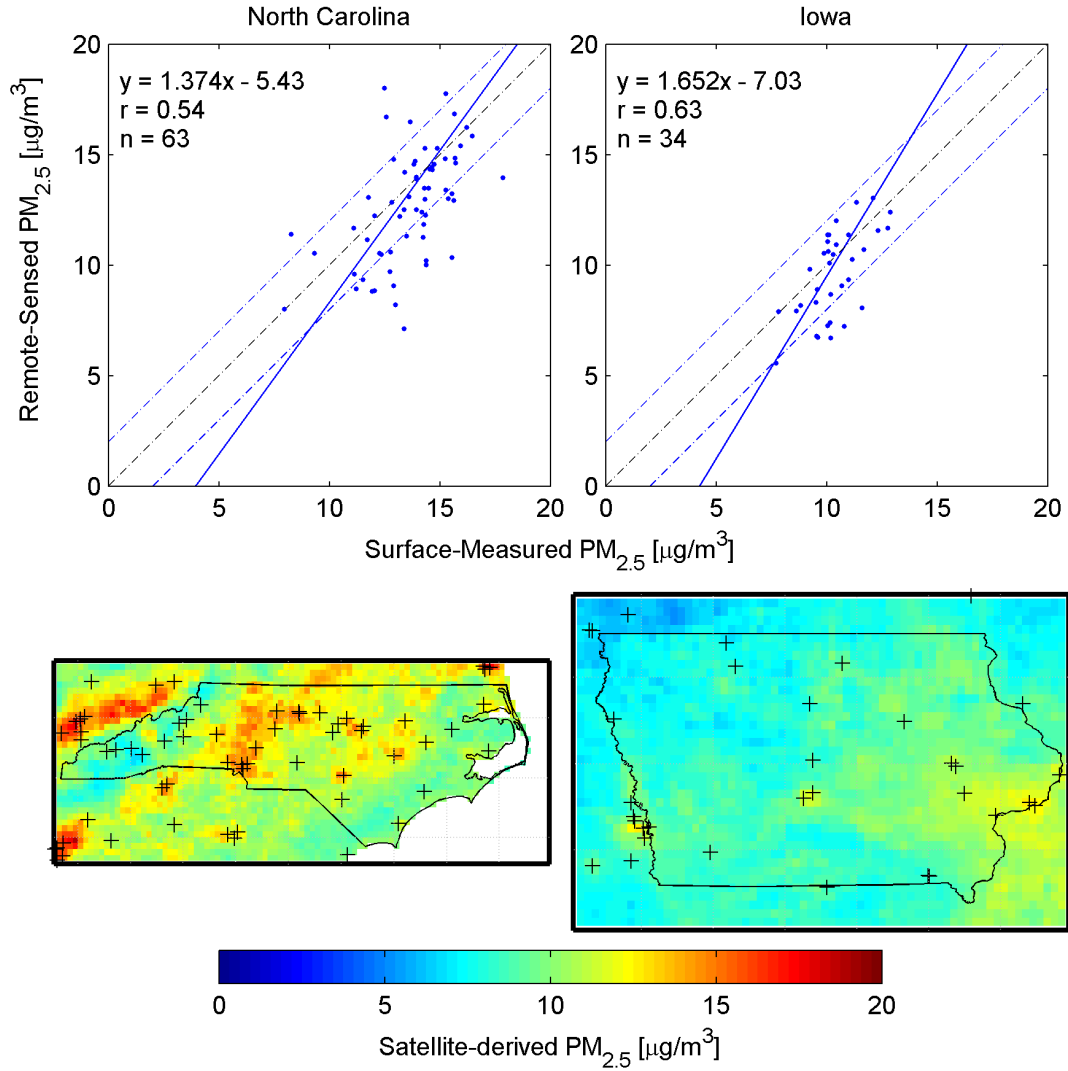

Supplement: ehp.1307277.s001.pdf [file ehp.1307277.s001.pdf]
